# Supplementary material for: Transcriptome analysis of adherens junction pathway-related genes after peripheral nerve injury
Source: PubMed Central journal article supplement — Neural Regen Res. 2018 Oct;13(10):1804–10. doi: 10.4103/1673-5374.237127 (PMC6128067; doi:10.4103/1673-5374.237127), 2018-10
Supplement: NRR-13-1804_Suppl1.pdf [file NRR-13-1804_Suppl1.pdf]

**Open peer review report 1**

**Reviewer: Johns Hopkins School of Medicine, Department of Urology, 1800 Orleans St, Marburg 134, Baltimore, MD 21287, UNITED STATES, 2162569212.**

**Comments to the authors:**

The authors present an interesting descriptive report on the transcriptome of adherens junctions in the sciatic nerve following injury. They evaluated the expression of adherens at the site of injury at different time points following injury. Although simple and descriptive, it provides valuable information for better understanding the differential regulation of adherens in the setting of peripheral nerve injury.
